# Supplementary material for: Synthesis, crystal structure and white luminescence of zero-dimensional organic–inorganic zinc halides
Source: Royal Society of Chemistry journal article supplement (doi:10.1039/d2tc04088c), 2022-01-01
Supplement: d2tc04088c1.pdf [file d2tc04088c1.pdf]

## Supporting Information

# Synthesis, Crystal Structure and White Luminescence of Zero-Dimensional Organic-Inorganic Zinc Halides

Qian Chen<sup>1</sup>, Fangxu Dai<sup>1</sup>, Kai Zhang<sup>1</sup>, Hong Zhou<sup>1</sup>, Mingming Zhang<sup>1\*</sup>, Dong Quan<sup>2</sup>, Lei Wang<sup>1,3</sup>, Jun Xing<sup>1\*</sup>

<sup>1</sup>Key Laboratory of Eco-chemical Engineering, Ministry of Education, College of Chemistry and Molecular Engineering, Qingdao University of Science and Technology, Qingdao 266042, P. R. China.

<sup>2</sup>School of Materials Science and Engineering, Shandong University, Jinan 250100, P. R. China.

<sup>3</sup>College of Environment and Safety Engineering, Qingdao University of Science and Technology, Shandong Engineering Research Center for Marine Environment Corrosion and Safety Protection, Qingdao 266042, P. R. China.

\*Correspondence: [zmm@qust.edu.cn](mailto:zmm@qust.edu.cn) (M.Z.) and [xingjun@qust.edu.cn](mailto:xingjun@qust.edu.cn) (J.X.)

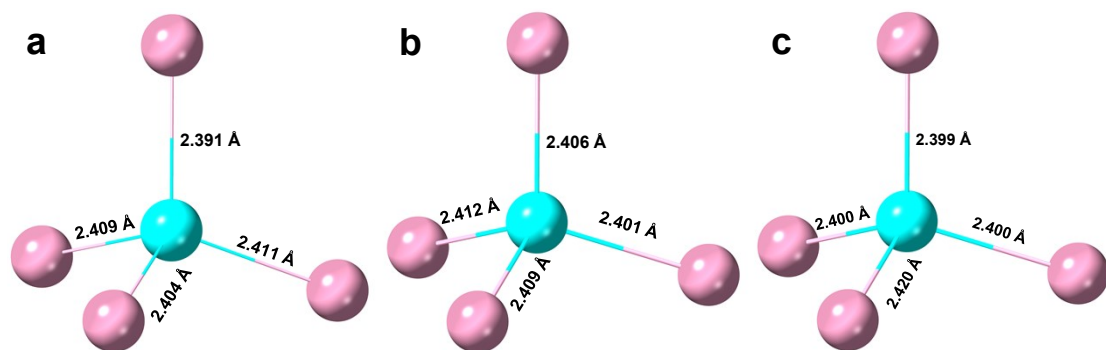

**Figure S1.** The Zn-Br bond length in crystals **1** (a), **2** (b), and **3** (c).

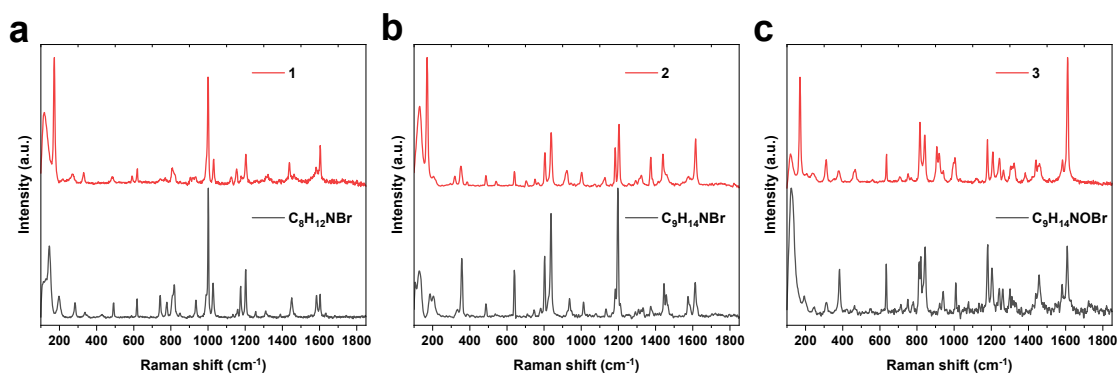

**Figure S2.** The Raman spectra of **1** and C<sub>8</sub>H<sub>12</sub>NBr (a), **2** and C<sub>9</sub>H<sub>14</sub>NBr (b), and **3** and C<sub>9</sub>H<sub>14</sub>NOBr (c).

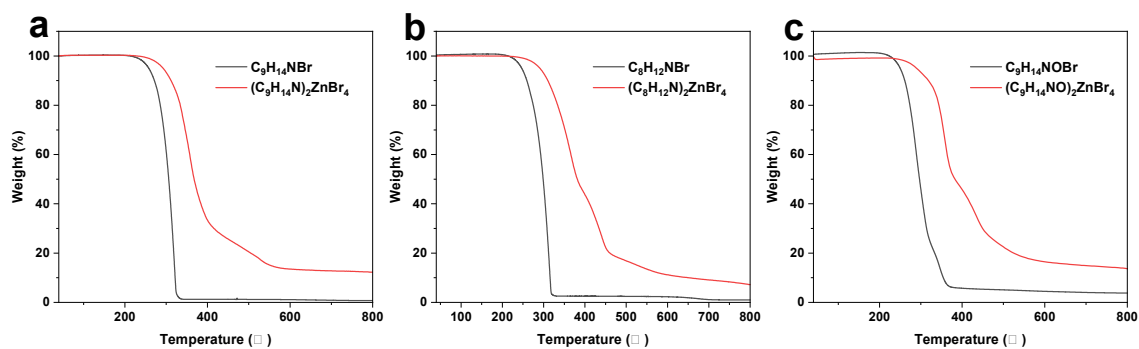

**Figure S3.** TG curves of compounds **1** (a), **2** (b), and **3** (c) with the corresponding organic ammonium.

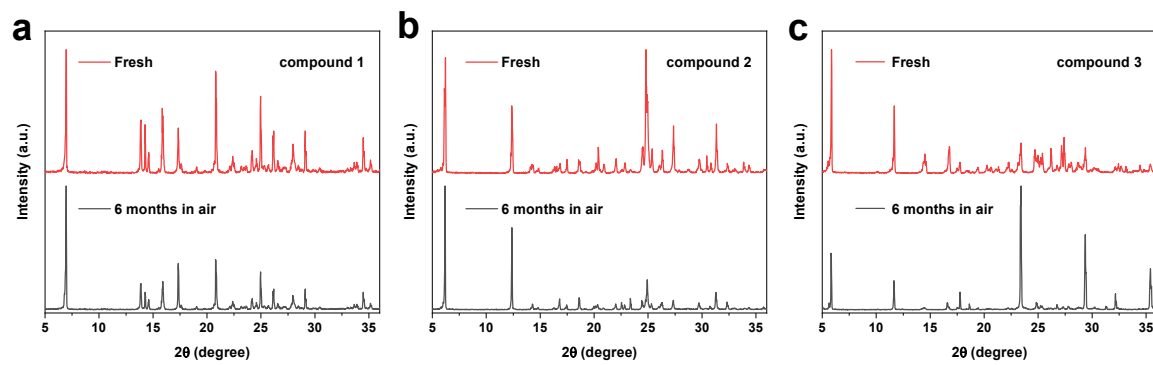

**Figure S4.** PXRD patterns of **1** (a), **2** (b), and **3** (c) stored 6 months in air.

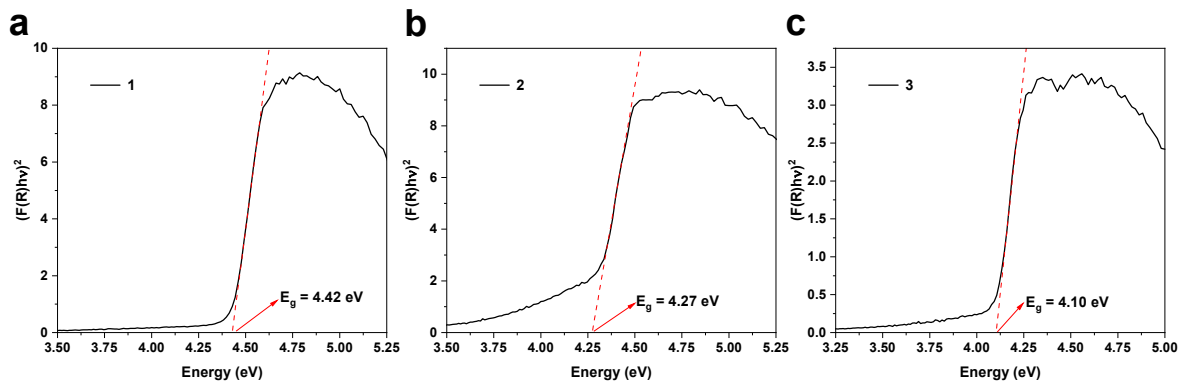

**Figure S5.** Tauc plots of **1** (a), **2** (b), and **3** (c) for the case of direct bandgaps.

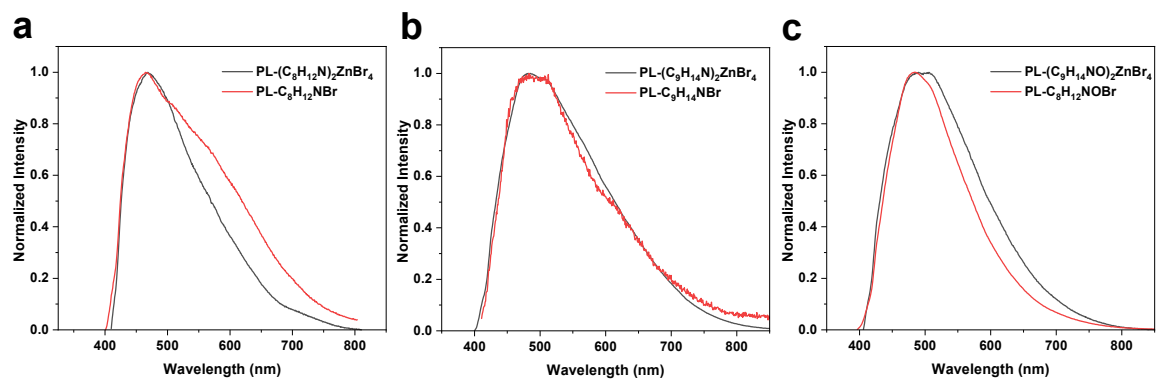

**Figure S6.** PL spectra of **1** and C<sub>8</sub>H<sub>12</sub>NBr (a), **2** and C<sub>9</sub>H<sub>14</sub>NBr (b), and **3** and C<sub>9</sub>H<sub>14</sub>NOBr (c).

**Table S1.** Fitting parameters for the PL decay curves using a two-exponential decay model of  $(\text{C}_8\text{H}_{12}\text{N})_2\text{ZnBr}_4$  at different emission wavelengths.

| Wavelength (nm) | $\tau_1$ (ns) | $A_1$ | $\tau_2$ (ns) | $A_2$   |
|-----------------|---------------|-------|---------------|---------|
| 440             | 2.90          | 0.34  | 0.31          | 4488.63 |
| 460             | 3.16          | 0.36  | 0.35          | 1703.58 |
| 500             | 3.51          | 0.25  | 0.31          | 5391.08 |



**Table S2.** Fitting parameters for the PL decay curves using a two-exponential decay model of  $(\text{C}_9\text{H}_{14}\text{N})_2\text{ZnBr}_4$  at different emission wavelengths.

| Wavelength (nm) | $\tau_1$ (ns) | $A_1$   | $\tau_2$ (ns) | $A_2$ |
|-----------------|---------------|---------|---------------|-------|
| 440             | 0.37          | 1401.98 | 3.16          | 0.32  |
| 460             | 0.50          | 180.92  | 3.47          | 0.50  |
| 500             | 0.39          | 898.32  | 3.54          | 0.36  |

**Table S3.** Fitting parameters for the PL decay curves using a two-exponential decay model of  $(\text{C}_9\text{H}_{14}\text{NO})_2\text{ZnBr}_4$  at different emission wavelengths.

| Wavelength (nm) | $\tau_1$ (ns) | $A_1$   | $\tau_2$ (ns) | $A_2$ |
|-----------------|---------------|---------|---------------|-------|
| 440             | 0.30          | 6888.29 | 3.11          | 0.26  |
| 460             | 0.33          | 2772.65 | 3.27          | 0.32  |
| 500             | 0.29          | 8260.31 | 3.34          | 0.28  |
